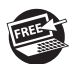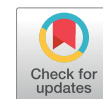

# Big Topics for *Diabetes Care* in 2018: Clinical Guidelines, Costs of Diabetes, and Information Technology

*Diabetes Care* 2018;41:1327–1329 | <https://doi.org/10.2337/dci18-0035>

*Diabetes Care's* editorial committee customarily presents a midyear report of activities and progress. At the midpoint of 2018 we can describe, in addition to a satisfying array of original scientific reports, important feature articles of current interest and a significant new initiative.

In the first half of this year, the journal published several feature articles related to our core responsibility as a journal representing the American Diabetes Association (ADA). An update to the ADA's "Standards of Medical Care in Diabetes" (Standards of Care [SOC]) appeared as a supplement to the January issue (1). The SOC is prepared by the Professional Practice Committee of the ADA and contains guidance on various aspects of care of those with or at risk for diabetes, together with summaries of published data supporting these statements. Because scientific information is accumulating faster than ever before, the ADA announced a new policy in the March 2018 issue (2). The yearly January supplement to *Diabetes Care* will continue as before, but the SOC will now be updated more frequently. The ADA now uses a web annotation tool to update and revise the online version throughout the year, whenever new evidence or regulatory changes merit immediate incorporation. Already in 2018 new information has been added regarding two medications recently approved by the U.S. Food and Drug Administration (semaglutide and ertugliflozin) and an update on the definitions of hypoglycemia. Changes of this kind will be communicated by the ADA through its print, online, and social media channels.

Additional consensus statements and commentaries on new or controversial topics will continue to appear in *Diabetes Care*. Unlike the SOC, they are not official guidance statements but generally reflect the ADA's thinking. For example, a joint statement by representatives of the ADA and the European Association for the Study of Diabetes in the December 2017 issue addressed the "clinical value and utility" of continuous glucose monitoring (3). The June 2018 issue featured an invited commentary on the discrepancy between the ADA's recommendations on blood pressure targets for patients with diabetes and those in a recent statement by the American College of Cardiology and the American Heart Association (4). Similarly, the June issue also presented a commentary prepared in response to a guidance statement from the American College of Physicians, which advocated relaxation of A1C targets for most people with type 2 diabetes (5). The latter commentaries summarized the available experimental evidence on these controversial issues and emphasized the ADA's view that clinical targets for people with diabetes should be individualized.

Another topic of intense interest in the U.S. is the continuing increase in costs attributable to diabetes. Every 5 years the ADA prepares an analysis of direct and indirect costs due to diabetes in the U.S. The most recent cost report appeared in the May 2018 issue of *Diabetes Care* (6), together with an editorial commentary (7) and a collection of original articles related to this topic. The ADA's analysis showed that rising costs were due to both the increasing prevalence of diabetes and increasing expenditures for each individual person with diabetes. The June issue contained a statement by an ADA working group (8) regarding the cost of insulin therapy, which accounts for a significant part of recent increases in costs (6), and a Perspective article placing this issue in a global as well as a national context (9). Our goal in publishing these articles, as with others that address controversial topics, is to improve the evidence base from which better clinical policies may be derived.

Matthew C. Riddle,<sup>1</sup> George Bakris,<sup>2</sup> Andrew J.M. Boulton,<sup>3</sup> Lawrence Blonde,<sup>4</sup> David D'Alessio,<sup>5</sup> Eddie L. Greene,<sup>6</sup> Mary de Groot,<sup>7</sup> Korey Hood,<sup>8</sup> Frank B. Hu,<sup>9</sup> Steven E. Kahn,<sup>10</sup> Sanjay Kaul,<sup>11</sup> Derek LeRoith,<sup>12</sup> Robert G. Moses,<sup>13</sup> Stephen S. Rich,<sup>14</sup> Julio Rosenstock,<sup>15</sup> William V. Tamborlane,<sup>16</sup> Judith Wylie-Rosett,<sup>17</sup> and Lyn Reynolds<sup>18</sup>

<sup>1</sup>Division of Endocrinology, Diabetes & Clinical Nutrition, Oregon Health & Science University, Portland, OR

<sup>2</sup>American Society of Hypertension Comprehensive Hypertension Center, Section of Endocrinology, Diabetes and Metabolism, Department of Medicine, The University of Chicago, Chicago, IL

<sup>3</sup>Manchester Diabetes Centre, University of Manchester, Manchester, U.K.

<sup>4</sup>Ochsner Diabetes Clinical Research Unit, Frank Riddick Diabetes Institute, Endocrinology Section, Ochsner Medical Center, New Orleans, LA

<sup>5</sup>Division of Endocrinology, Metabolism, and Nutrition, Duke University, Durham, NC

<sup>6</sup>Division of Nephrology and Hypertension, Mayo Clinic, Rochester, MN

<sup>7</sup>Indiana University School of Medicine, Indianapolis, IN

<sup>8</sup>Stanford University, Palo Alto, CA

<sup>9</sup>Departments of Nutrition and Epidemiology, Harvard T.H. Chan School of Public Health, Boston, MA

<sup>10</sup>Division of Metabolism, Endocrinology and Nutrition, Department of Medicine, VA Puget Sound Health System and the University of Washington School of Medicine, Seattle, WA

<sup>11</sup>Cedars-Sinai Medical Center, Los Angeles, CA

<sup>12</sup>Division of Endocrinology, Diabetes and Bone Disease, Icahn School of Medicine at Mount Sinai, New York, NY

<sup>13</sup>Illawarra Shoalhaven Local Health District, Wollongong, New South Wales, Australia

<sup>14</sup>Center for Public Health Genomics, University of Virginia, Charlottesville, VA

<sup>15</sup>Dallas Diabetes Research Center at Medical City, Dallas, TX

<sup>16</sup>Department of Pediatrics, Yale School of Medicine, New Haven, CT

<sup>17</sup>Department of Epidemiology and Population Health, Albert Einstein College of Medicine, Bronx, NY

<sup>18</sup>American Diabetes Association, Indianapolis, IN

Corresponding author: Matthew C. Riddle, [riddlem@ohsu.edu](mailto:riddlem@ohsu.edu).

© 2018 by the American Diabetes Association. Readers may use this article as long as the work is properly cited, the use is educational and not for profit, and the work is not altered. More information is available at <http://www.diabetesjournals.org/content/license>.

Beyond concerns that directly affect clinical practice in the U.S., issues of *Diabetes Care* in 2018 have contained articles illustrating that diabetes is a global problem. More than 70% of the manuscripts submitted to the journal for review come from outside the U.S. Notable contributions include an analysis of a Chinese database that included >500,000 people followed for almost 10 years, that described a strong association between increasing obesity and incident diabetes in this population (10). Related to this rising tide of diabetes, an analysis of economic trends between now and the year 2030 predicted further increases in costs attributable to diabetes throughout the world (11). A multinational group of authors examined inconsistencies and limitations in clinical guidelines for the management of diabetes in different countries and called for greater efforts to coordinate strategies while matching specific tactics to local circumstances (12).

These and other studies of similarities and differences in diabetes and its management between regions of the world would not be possible without recent improvements in information technology (IT). We are all now linked by the internet, cell phones, social media, and computerized databases, and these repositories of information and channels of communication are affecting the study and treatment of diabetes in various ways. *Diabetes Care* depends on these resources for processing all submitted manuscripts, publishing and disseminating accepted articles, and measuring their impact. Scientists are accustomed to conducting and reporting basic and clinical research in a common language and to interacting with colleagues frequently across thousands of miles. At local levels, both scientific and clinical activities are being transformed by various specific applications of IT. Electronic medical records, research databases, and local and national registries are among these tools, as are glucose sensors, smart insulin-delivery devices, and systems by which study participants and patients can communicate with researchers and medical providers.

Because of the increasing importance of IT systems for collecting, managing, analyzing, and distributing data—and linking it to therapeutic devices—*Diabetes Care* plans to sharpen its focus on them. To introduce this initiative, the December 2017 issue featured a group of articles on continuous glucose monitoring, reporting

major steps toward an international consensus on describing and summarizing data collected by this means (13,14). Recently, the 2018 *Diabetes Care* Symposium at the ADA's annual Scientific Sessions included lectures by three experts in the use of advanced technology in clinical settings where good glycemic control is highly desirable yet difficult to attain. These lectures have been summarized in articles that will appear in the August 2018 issue of *Diabetes Care* and are already available online (15–17). Jennifer Sherr (15) describes management of type 1 diabetes in youth with smart glucose-sensing and insulin-delivery systems. Helen Murphy (16) provides a similar evaluation of such systems used during pregnancy, and Guillermo Umpierrez and David Klonoff (17) cover their use during acute hospitalizations. Also during the June 2018 Scientific Sessions, *Diabetes Care* convened an expert group to discuss the benefits and potential problems of managing large databases for both research and clinical practice, with the goal of publishing its conclusions at a later date. Finally, and most relevant to the journal itself, *Diabetes Care* will add a new section for articles dealing with “Emerging Technologies: Data Systems and Devices.”

The presence of IT in everyday life is obvious to everyone. Its difficulties, as well as its benefits, are ever apparent in daily use for the study and treatment of diabetes. Data may be collected without consistent definitions of terms and in varying formats. Data management systems may become outmoded or they may be incompatible from one research group, health system, or country to another. The same is true for competing devices that are marketed commercially. Treatment goals and means of assessing them are often not consistent between health systems and regions. To realize the full potential of IT, efforts to harmonize the way data are collected and managed are essential. It is in this context that the consensus statements on continuous glucose monitoring mentioned earlier signal a major step forward. The editorial committee aims to place *Diabetes Care* at the forefront of efforts to improve the application of IT to diabetes care and to report progress in this area as in others.

**Duality of Interest.** M.C.R. has served as a consultant for Adocia, GlaxoSmithKline, Elcelyx

Therapeutics, Inc., Sanofi, and Theracos, Inc., and has received research support from AstraZeneca and Eli Lilly and Company. G.B. has served as a consultant for Bayer, Janssen Pharmaceuticals, Inc., Merck, Relypsa, Inc., and Vascular Dynamics. A.J.M.B. has served as a board member and/or on the advisory panel of Pfizer and Takeda Pharmaceuticals U.S.A., Inc. L.B. has served as a board member and/or on the advisory panel for Intarcia Therapeutics, Inc., Merck, Novo Nordisk, Inc., and Sanofi; has received research support from AstraZeneca, Janssen Scientific Affairs, LLC, Lexicon Pharmaceuticals, Inc., Novo Nordisk, Inc., and Sanofi; and has served on the speaker's bureau for AstraZeneca, Janssen Pharmaceuticals, Inc., Novo Nordisk, Inc., and Sanofi. D.D.A. has served as a consultant for Intarcia Therapeutics, Inc., Lilly, Merck, and Novo Nordisk, Inc., and has received research support from Merck and Ligand Pharmaceuticals, Inc. M.d.G. has served as a consultant for Johnson & Johnson Diabetes Institute and Lilly. K.H. has served as a consultant for Johnson & Johnson Diabetes Institute, Lilly Innovation Center, Bigfoot Biomedical, and Insulet, and has received research support from Dexcom, Inc. F.B.H. has served as a consultant for Metagenics and has received research support from the California Walnut Board. S.E.K. has served as a consultant for Boehringer Ingelheim, Elcelyx Therapeutics, Inc., Intarcia Therapeutics, Inc., Janssen Pharmaceuticals, Inc., Merck, and Novo Nordisk, Inc., and on the speaker's bureau of Boehringer Ingelheim, Merck, and Novo Nordisk, Inc. S.K. has served as a consultant for Boehringer Ingelheim, Johnson & Johnson, and Novo Nordisk, Inc., and is a stock/shareholder in Johnson & Johnson. D.L. has served on the advisory board for AstraZeneca and MannKind. J.R. has served as a board member and/or on the advisory panel for Boehringer Ingelheim, Intarcia Therapeutics, Inc., Janssen Pharmaceuticals, Inc., Lilly, Novo Nordisk, Inc., and Sanofi; has served as a consultant for Boehringer Ingelheim, Intarcia Therapeutics, Inc., Janssen Pharmaceuticals, Inc., Lilly, Novo Nordisk, Inc., and Sanofi; and has received research support from AstraZeneca, Boehringer Ingelheim, Bristol-Myers Squibb, Genentech, GlaxoSmithKline, Intarcia Therapeutics, Inc., Janssen Pharmaceuticals, Inc., Lexicon Pharmaceuticals, Inc., Lilly, Merck, Novo Nordisk, Inc., Pfizer, and Sanofi. W.V.T. has served as a consultant for AstraZeneca, Boehringer Ingelheim, Lilly, Medtronic Diabetes, Novo Nordisk, Inc., Sanofi, and Takeda. No other potential conflicts of interest relevant to this article were reported.

## References

1. American Diabetes Association. Standards of Medical Care in Diabetes—2018. *Diabetes Care* 2018;41(Suppl. 1):S1–S153
2. Cefalu WT, Berg EG, Petersen MP, Darsow T. American Diabetes Association's Standards of Care: a paradigm shift in the dissemination of information. *Diabetes Care* 2018;41:387–388
3. Petrie JR, Peters AL, Bergenstal RM, Holl RW, Fleming GA, Heinemann L. Improving the clinical value and utility of CGM systems: issues and recommendations: a joint statement of the European Association for the Study of Diabetes and the American Diabetes Association Diabetes Technology Working Group. *Diabetes Care* 2017;40:1614–1621
4. Lamprea-Montealegre JA, de Boer IH. Reevaluating the evidence for blood pressure targets in type 2 diabetes. *Diabetes Care* 2018;41:1132–1133

5. Riddle MC, Gerstein HC, Holman RR, et al. A1C targets should be personalized to maximize benefits while limiting risks. *Diabetes Care* 2018;41:1121–1124
6. American Diabetes Association. Economic costs of diabetes in the U.S. in 2017. *Diabetes Care* 2018;41:917–928
7. Riddle MC, Herman WH. The cost of diabetes care—an elephant in the room. *Diabetes Care* 2018;41:929–932
8. Cefalu WT, Dawes DE, Gaviak G, et al.; Insulin Access and Affordability Working Group. Insulin Access and Affordability Working Group: conclusions and recommendations. *Diabetes Care* 2018;41:1299–1311
9. Beran D, Hirsch IB, Yudkin JS. Why are we failing to address the issue of access to insulin? A national and global perspective. *Diabetes Care* 2018;41:1125–1131
10. Bragg F, Tang K, Guo Y, et al.; China Kadoorie Biobank (CKB) Collaborative Group. Associations of general and central adiposity with incident diabetes in Chinese men and women. *Diabetes Care* 2018;41:494–502
11. Bommer C, Sagalova V, Heeseemann E, et al. Global economic burden of diabetes in adults: projections from 2015 to 2030. *Diabetes Care* 2018;41:963–970
12. Owolabi MO, Yaria JO, Daivadanam M, et al. Gaps in guidelines for the management of diabetes in low- and middle-income versus high-income countries—a systematic review. *Diabetes Care* 2018;41:1097–1105
13. Agiostratidou G, Anhalt H, Ball D, et al. Standardizing clinically meaningful outcome measures beyond HbA<sub>1c</sub> for type 1 diabetes: a consensus report of the American Association of Clinical Endocrinologists, the American Association of Diabetes Educators, the American Diabetes Association, the Endocrine Society, JDRF International, The Leona M. and Harry B. Helmsley Charitable Trust, the Pediatric Endocrine Society, and the T1D Exchange. *Diabetes Care* 2017;40:1622–1630
14. Danne T, Nimri R, Battelino T, et al. International consensus on use of continuous glucose monitoring. *Diabetes Care* 2017;40:1631–1640
15. Sherr JL. Closing the loop on managing youth with type 1 diabetes: children are not just small adults. *Diabetes Care*. 23 May 2018 [Epub ahead of print]. DOI: 10.2337/dci18-0003
16. Murphy HR. Intensive glycemic treatment during type 1 diabetes pregnancy: a story of (mostly) sweet success! *Diabetes Care*. 23 May 2018 [Epub ahead of print]. DOI: 10.2337/dci18-0001
17. Umpierrez GE, Klonoff DC. Diabetes technology update: use of insulin pumps and continuous glucose monitoring in the hospital. *Diabetes Care*. 23 May 2018 [Epub ahead of print]. DOI: 10.2337/dci18-0002
